# Supplementary material for: A novel near-infrared ratiometric fluorescent probe for SO2 detection with a large emission shift
Source: Royal Society of Chemistry journal article supplement (doi:10.1039/c9nj06343a), 2020-01-01
Supplement: c9nj06343a1.pdf [file c9nj06343a1.pdf]

## **A novel near-infrared ratiometric fluorescent probe for SO<sub>2</sub> detection with a large emission shift**

Shaohui Han,<sup>a</sup> Xiuxiu Yue,<sup>a</sup> Jingpei Wang,<sup>a</sup> Yun Zhang,<sup>a</sup> Benhua Wang,<sup>a, \*</sup> and Xiangzhi Song<sup>a, b</sup>

<sup>a</sup> College of Chemistry & Chemical Engineering, Central South University, Changsha, Hunan 410083, China

<sup>b</sup> Key Laboratory of Hunan Province for Water Environment and Agriculture Product Safety, Changsha, Hunan 410083, China

\*Corresponding authors.

Fax: +86-731-88836954; E-mails: [benhuawang@csu.edu.cn](mailto:benhuawang@csu.edu.cn); [song@rowland.harvard.edu](mailto:song@rowland.harvard.edu)

## Experimental

### Reagents, materials and apparatus

Unless otherwise stated, all reagents were purchased from commercial suppliers and used without further purification. Solvents were purified by standard methods prior to use. Silica gel thin layer chromatography (TLC) plates and silica gel (200-300 mesh) were purchased from Qingdao Ocean Ltd Co. All the reactions were monitored by TLC, and the intermediates were purified by a silica gel column.  $^1\text{H}$ NMR and  $^{13}\text{C}$  NMR were recorded on Bruker Avance 400 NMR and 500 NMR spectrometers. Twice-distilled water was used throughout all experiments. The fluorescence and UV-visible absorption spectra were measured on Hitachi F7000 spectrofluorometer and UV-2450 spectrophotometer, respectively. A Leici PHS-3C meter was used for pH measurements. Fluorescence imaging experiments were performed on Olympus FV1000 and Nikon ARsiMP confocal microscopes.

### Spectral measurements

All spectral measurements were carried out in PBS buffer (10.0 mmol/L, pH = 7.4) containing 50% DMSO at 25 °C. Fluorescence spectra were monitored with excitation wavelengths at 414 nm and 544 nm, respectively, and the slit widths were 10.0 nm/10.0 nm.

### Detection limit

Detection limit was calculated according to the following equation:

$$\text{Detection limit} = 3\sigma/k$$

Where  $\sigma$  is the standard deviation of blank measurement,  $k$  is the slope between the  $F_{470\text{ nm}}/F_{715\text{ nm}}$  versus  $\text{SO}_3^{2-}$  concentration.

### Cell culture and fluorescence imaging experiments

Living MCF-7 cells were grown in Dulbecco's modified Eagle's medium (DMEM) supplemented with 10% fetal bovine serum and 1% penicillin under a humidified

atmosphere on glass-bottom culture dishes and allowed to adhere for 24 h. Before use, cells were washed three times with PBS buffer. Cells were firstly incubated with **MQC** (10  $\mu\text{mol/L}$ ) for 20 min at 37  $^{\circ}\text{C}$ , and then treated with  $\text{Na}_2\text{SO}_3$  (0.3  $\text{mmol/L}$ ) for 20 min at 37  $^{\circ}\text{C}$ . For the control experiment, MCF-7 cells were only incubated with **MQC** (10  $\mu\text{mol/L}$ ) for 20 min at 37  $^{\circ}\text{C}$ . Cells were washed with PBS buffer before cell imaging experiments.

## Synthesis

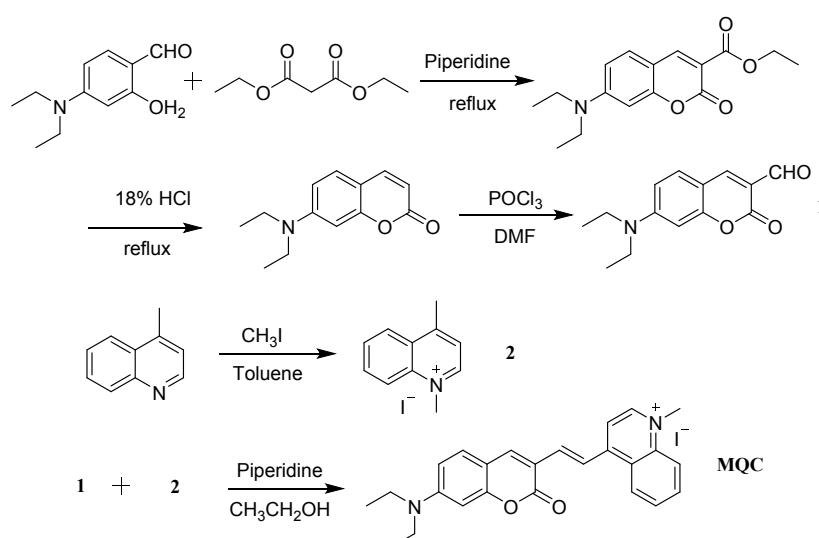

**Scheme S1.** The synthetic route of probe **MQC**.

Compounds **1** and **2** were synthesized according to the reported procedures in the literature<sup>1-2</sup>.

### Synthesis of **MQC**

Compounds **1** (49.0 mg, 0.20  $\text{mmol/Lol}$ ) and **2** (68.4 mg, 0.24  $\text{mmol/Lol}$ ) and 5  $\mu\text{L}$  piperidine were dissolved in 10 mL anhydrous ethanol. Then the mixture was stirred at 80  $^{\circ}\text{C}$  under nitrogen for 5 h. After ethanol was evaporated under a reduced pressure, the crude product was purified by silica gel flash chromatography with  $\text{CH}_2\text{Cl}_2$  to  $\text{CH}_2\text{Cl}_2/\text{MeOH}=20:1$  as eluent to afford compound **MQC** as a black powder (75.0 mg, 73.3%).  $^1\text{H NMR}$  (400 MHz,  $\text{DMSO}-d_6$ )  $\delta$  9.24 (d,  $J = 6.6$  Hz, 1H), 8.68 (d,  $J = 8.5$  Hz, 1H), 8.48 (s, 1H), 8.42 - 8.32 (m, 3H), 8.26 - 8.17 (m, 1H), 8.01 (dd,  $J = 17.3, 11.7$  Hz, 2H), 7.51 (d,  $J = 9.0$  Hz, 1H), 6.79 (dd,  $J = 9.0, 1.8$  Hz, 1H),

6.56 (s, 1H), 4.50 (s, 3H), 3.49 (dd,  $J = 13.7, 6.7$  Hz, 4H), 1.16 (t,  $J = 6.9$  Hz, 6H).  $^{13}\text{C}$  NMR (100 MHz, DMSO- $d_6$ )  $\delta$  160.46, 156.96, 152.80, 152.61, 148.15, 145.62, 139.16, 138.69, 135.30, 131.37, 129.78, 126.42, 126.07, 119.85, 118.83, 115.79, 114.36, 110.69, 109.03, 96.76, 56.49, 45.00, 44.92, 19.04, 12.91. MS (ESI)  $m/z$  calcd for  $\text{C}_{25}\text{H}_{25}\text{N}_2\text{O}_2$   $[\text{M}]^+$ : 385.1911, found: 385.1893.

**Table. S1** Some fluorescent probes for SO<sub>2</sub>.

| Probes                                                                              | Types         | Emission wavelength /nm | Emission shift/nm | Response time | Medium                            | Ref. |
|-------------------------------------------------------------------------------------|---------------|-------------------------|-------------------|---------------|-----------------------------------|------|
| 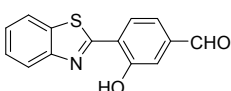   | rationometric | 467, 563                | 96                | seconds       | PBS buffer (containing 10% CTAB)  | 3    |
|    | rationometric | 473, 573                | 100               | 5 min         | PBS buffer (pH = 7)               | 4    |
|    | rationometric | 520, 740                | 220               | 80 min        | PBS buffer (containing 10% DMSO)  | 5    |
|    | rationometric | 530, 582                | 52                | 2 min         | PBS buffer (containing 30% DMF)   | 6    |
|  | rationometric | 467, 593                | 126               | 30 s          | PBS buffer (pH = 7)               | 7    |
|  | rationometric | 450, 645                | 195               | seconds       | PBS buffer (containing 5% DMSO)   | 8    |
|  | rationometric | 475, 650                | 175               | 5 min         | PBS buffer (containing 30% EtOH)  | 9    |
|  | turn on       | 388                     | 0                 | 30 s          | PBS buffer (containing 2.5% CTAB) | 10   |
|  | turn on       | 585                     | 0                 | 15 s          | HEPES buffer                      | 11   |

|                                                                                   |             |          |     |        |                                        |              |
|-----------------------------------------------------------------------------------|-------------|----------|-----|--------|----------------------------------------|--------------|
| 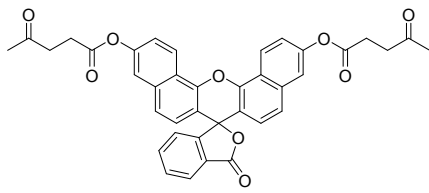 | turn on     | 695      | 0   | 20 min | PBS buffer<br>(containing<br>50% DMSO) | 12           |
|  | ratiometric | 470, 715 | 245 | 5 min  | PBS buffer<br>(containing<br>50% DMSO) | this<br>work |

## Characterization data

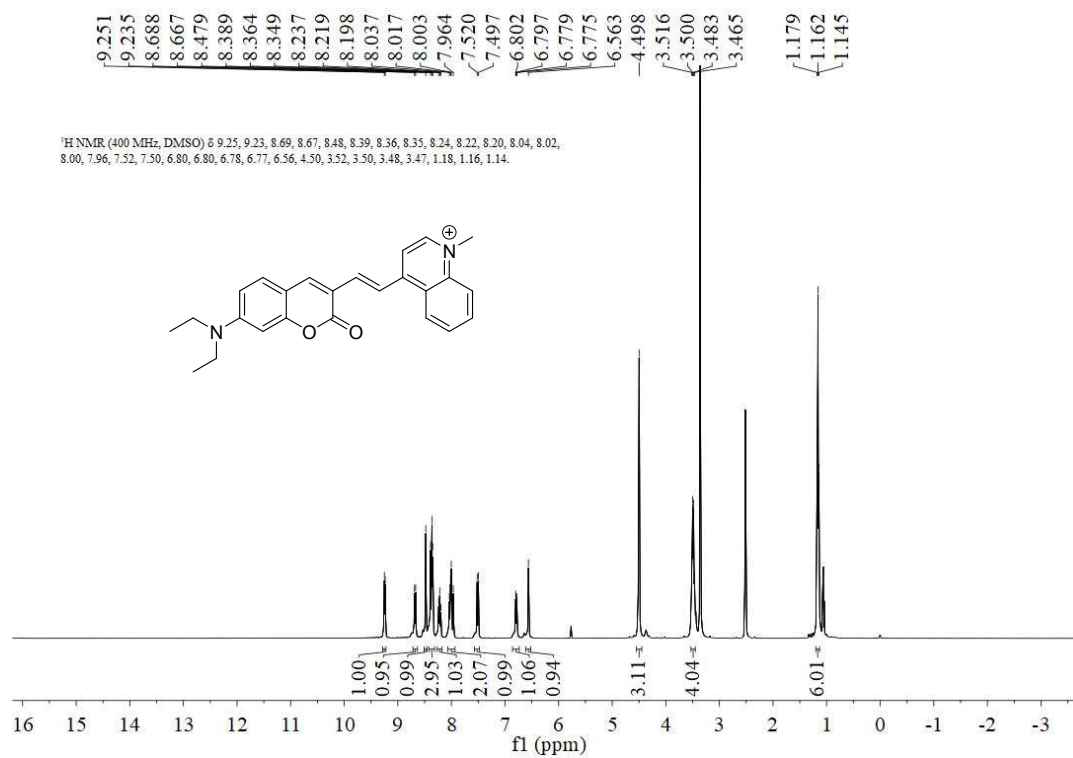

**Fig. S1** <sup>1</sup>H NMR spectrum of probe MQC in DMSO-*d*<sub>6</sub>.

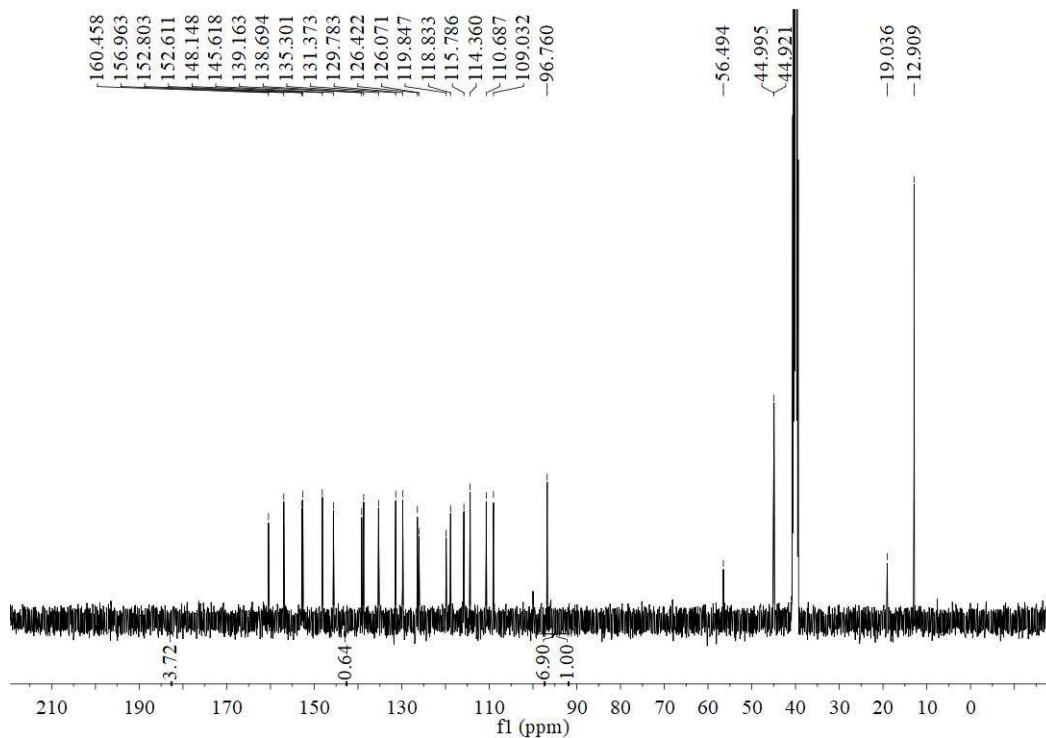

**Fig. S2**  $^{13}\text{C}$  NMR spectrum of probe **MQC** in  $\text{DMSO-}d_6$ .

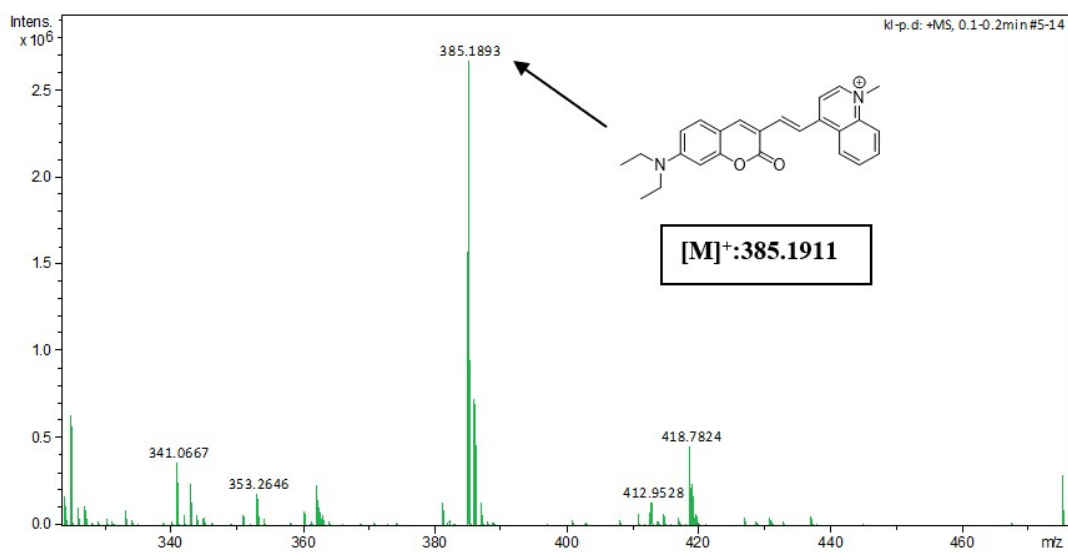

**Fig. S3** HRMS spectrum of probe **MQC**.

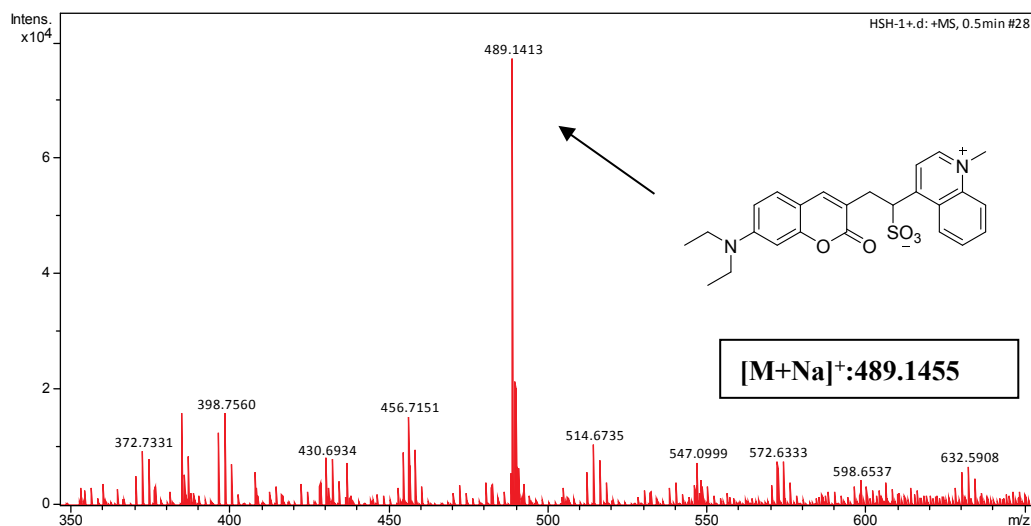

**Fig. S4** HRMS spectrum of probe MQC in the presence of  $\text{SO}_3^{2-}$ .

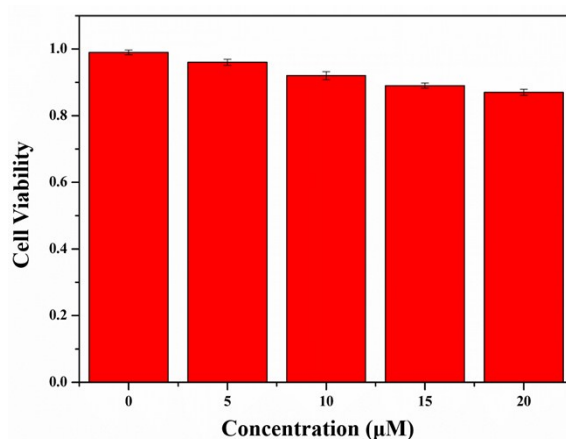

**Fig. S5** MTT assay of MCF-7 cells incubated with different concentrations of probe MQC.

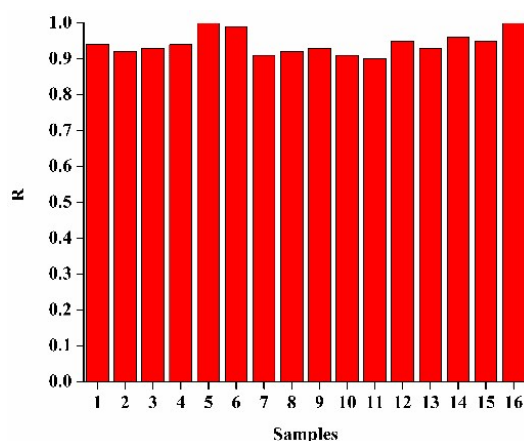

**Fig. S6** The fluorescence intensity ratio  $F_{470 \text{ nm}}/F_{715 \text{ nm}}$  of probe MQC (10  $\mu\text{M}$ ) with  $\text{Na}_2\text{SO}_3$  (300  $\mu\text{M}$ ) in the co-existence of relevant species in PBS buffer (10.0 mM, pH = 7.4, containing 50% DMSO). Species: 1.  $\text{Zn}^{2+}$ ; 2.  $\text{Fe}^{2+}$ ; 3.  $\text{F}^-$ ; 4.  $\text{Cl}^-$ ; 5.  $\text{NO}_3^-$ ; 6.  $\text{NO}_2^-$ ; 7.  $\text{SO}_4^{2-}$ ; 8. Cys; 9. Hcy; 10. GSH; 11. BHP; 12.  $\text{ROO}^-$ ; 13.  $\text{H}_2\text{O}_2$ ; 14. NO; 15.  $\text{S}^{2-}$ ; 16.  $\text{SO}_3^{2-}$ . The Y-axis  $R$  represents the ratio of  $F_{470 \text{ nm}}/F_{715 \text{ nm}}$  of probe MQC and  $\text{Na}_2\text{SO}_3$  with and without other species.



## Reference

1. M. E. Aliaga, M. Gazitua, A. Rojas-Bolaños, M. Fuentes-Estrada, D. Durango and O. García-Beltrán, *Spectrochim. Acta, Part A*, 2020, **224**, 117372.
2. M. Xiang, H. Huang, X. Liu, Z. Tong, C. Zhang, F. Wang, R. Yu and J. Jiang, *Anal. Chem.*, 2019, **91**, 5489-5493.
3. X. Liu, Q. Yang, W. Chen, L. Mo, S. Chen, J. Kang and X. Song, *Org. Biomol. Chem.*, 2015, **13**, 8663-8668.
4. C. Gao, Y. Tian, R. Zhang, J. Jing and X. Zhang, *New J. Chem.*, 2019, **43**, 5255-5259.
5. K. Liu, Y. Chen, H. Sun, S. Wang and F. Kong, *J. Mater. Chem. B*, 2018, **6**, 7060-7065.
6. D. Li, Z. Wang, X. Cao, J. Cui, X. Wang, H. Cui, J. Miao and B. Zhao, *Chem. Comm.*, 2016, **52**, 2760-2763.
7. Y. Wang, Q. Meng, R. Zhang, H. Jia, X. Zhang and Z. Zhang, *Org. Biomol. Chem.*, 2017, **15**, 2734-2739.
8. Y. Ma, Y. Tang, Y. Zhao, S. Gao and W. Lin, *Anal. Chem.*, 2017, **89**, 9388-9393.
9. W. Xu, C. L. Teoh, J. Peng, D. Su, L. Yuan and Y. Chang, *Biomaterials*, 2015, **56**, 1-9.
10. H. Li, Q. Yao, J. Fan, C. Hu, F. Xu, J. Du, J. Wang and X. Peng, *Ind. Eng. Chem. Res.*, 2016, **55**, 1477-1483.
11. W. Chen, Q. Fang, D. Yang, H. Zhang, X. Song and J. Foley, *Anal. Chem.*, 2015, **87**, 609-616.
12. H. Zhang, S. Xue and G. Feng, *Sens. Actuators, B*, 2016, **231**, 752-758.
